# Supplementary material for: HS-SPME/GC×GC-TOFMS-Based Flavoromics and Antimicrobial Properties of the Aroma Components of Zanthoxylum motuoense
Source: MDPI journal article supplement (doi:10.3390/foods12112225), 2023-05-31
Supplement: s1 [file s1]

## Supporting information

**Table S1.**

Identification of volatile compounds in MEO and BEO.

| NO. | compounds                       | CAS       | rt      | MEO-<br>1 | MEO-<br>2 | MEO-<br>3 | MEO-<br>4 | MEO(relative<br>content %) | BEO-<br>1 | BEO-<br>2 | BEO-<br>3 | BEO-<br>4 | BEO(relative<br>content %) |
|-----|---------------------------------|-----------|---------|-----------|-----------|-----------|-----------|----------------------------|-----------|-----------|-----------|-----------|----------------------------|
| 1   | (+)4-Carene                     | 29050-33- |         | 0.1472    | 10.288    | 7.0071    | 117.63    |                            | 189.17    | 270.06    | 280.71    | 320.32    |                            |
|     |                                 | 7         | 28.5    | 23799     | 13041     | 29632     | 68689     | 0.084±0.049                | 7981      | 62432     | 12211     | 75622     | 13.941±2.519               |
|     |                                 | 59341-22- |         | 7021.8    | 5189.5    | 5534.3    | 1.5043    |                            | 20.936    | 23.742    | 33.592    | 23.208    |                            |
| 2   | (3H)Indazole, 3,3-dimethyl-     | 9         | 47.1667 | 35941     | 06946     | 04819     | 769       | 37.02±3.376                | 40468     | 97927     | 09292     | 2248      | 0.278±0.040                |
|     |                                 |           |         | 1184.9    | 1329.6    | 1238.6    | 14.246    |                            | 0.1472    | 47.720    | 0.1472    | 0.1472    |                            |
| 3   | Ethanol, 2-(ethenyloxy)-        | 764-48-7  | 47.1667 | 53113     | 44498     | 96759     | 50239     | 0.067±0.078                | 23799     | 09607     | 23799     | 23799     | 0.171±0.019                |
|     |                                 | 92418-72- |         | 0.1472    | 23.129    | 17.559    | 48.106    |                            | 0.1472    | 309.94    | 0.1472    | 1254.0    |                            |
| 4   | (3-Methyl-oxiran-2-yl)-methanol | 9         | 41.5    | 23799     | 4614      | 64585     | 8453      | 31.820±6.350               | 23799     | 01905     | 23799     | 84353     | 15.173±3.722               |
|     |                                 |           |         | 4507.0    | 4365.1    | 6293.0    | 0.1472    |                            | 10.734    | 13.815    | 17.239    | 13.309    |                            |
| 5   | $\alpha$ -Phellandrene          | 99-83-2   | 16      | 30823     | 35458     | 68021     | 23799     | 5.525±0.393                | 67916     | 01973     | 65961     | 27889     | 25.567±0.193               |
|     |                                 |           |         | 0.1472    | 792.51    | 0.1472    | 66.390    |                            | 165.20    | 183.47    | 342.71    | 179.51    |                            |
| 6   | $\alpha$ -Pinene                | 80-56-8   | 19.6667 | 23799     | 04271     | 23799     | 02594     | 0.975±0.005                | 59228     | 4399      | 58872     | 38514     | 8.696±1.990                |
|     |                                 |           |         | 166.72    | 133.02    | 151.09    | 106.85    |                            | 288.96    | 344.12    | 397.30    | 346.90    | 67.807±19.99               |
| 7   | $\alpha$ -Terpineol             | 98-55-5   | 30.4167 | 73503     | 7837      | 89398     | 49365     | 56.220±11.634              | 72662     | 83433     | 53884     | 1256      | 5                          |
|     |                                 |           |         | 8363.3    | 7353.7    | 11289.    | 18.556    |                            | 24.035    | 15.847    | 23.307    | 30.627    |                            |
| 8   | $\beta$ -Myrcene                | 123-35-3  | 16      | 63771     | 7643      | 25187     | 5441      | 7.618±0.444                | 27571     | 45423     | 58609     | 67254     | 0±0                        |

|    |                                         |           |           |        |        |        |        |              |        |        |        |        |              |              |
|----|-----------------------------------------|-----------|-----------|--------|--------|--------|--------|--------------|--------|--------|--------|--------|--------------|--------------|
|    |                                         |           | 13877-91- |        | 1406.9 | 1082.1 | 1138.6 | 1.7214       |        | 7.8148 | 7.3683 | 10.499 | 9.6058       | 48.478±16.23 |
| 9  | β-Ocimene                               | 3         | 18.6667   | 87418  | 11405  | 43461  | 16388  | 86.215±3.214 | 39999  | 57394  | 16787  | 79132  | 6            |              |
|    |                                         |           |           | 14281. | 8929.9 | 13292. | 4.6536 |              | 8.9940 | 9.9480 | 9.3779 | 11.126 |              |              |
| 10 | β-Phellandrene                          | 555-10-2  | 17.5833   | 25636  | 14589  | 54585  | 79664  | 5.590±0.271  | 64067  | 17696  | 72826  | 71637  | 35.583±3.335 |              |
|    |                                         |           |           | 1006.5 | 847.30 | 818.87 | 2.1827 |              | 6.6543 | 7.2485 | 8.8481 | 6.1950 |              |              |
| 11 | β-Pinene                                | 127-91-3  | 14        | 57358  | 84093  | 55164  | 32065  | 0.244±0.279  | 4751   | 36282  | 49569  | 99736  | 0.314±0.249  |              |
|    |                                         | 91216-95- |           | 35.798 | 0.1472 | 19.180 | 10792. |              | 12660. | 18553. | 15713. | 13954. |              |              |
| 12 | γ-Glutamyl-(S)-allyl-L-cysteine         | 4         | 45.1667   | 80714  | 23799  | 75315  | 71505  | 6.859±3.837  | 37914  | 37838  | 44023  | 16135  | 38.933±8.181 |              |
|    |                                         |           |           | 1593.5 | 507.75 | 590.84 | 11.597 |              | 26.507 | 34.539 | 36.451 | 23.839 |              |              |
| 13 | γ-Terpinene                             | 99-85-4   | 25.0833   | 94621  | 33004  | 69883  | 14017  | 0.001±0.000  | 22609  | 69842  | 73891  | 81754  | 0.071±0.042  |              |
|    |                                         | 211321-   |           | 35.910 | 0.1472 | 0.1472 | 18.114 |              | 35.412 | 43.104 | 50.669 | 40.651 |              |              |
| 14 | 1-(2-Methoxyethoxy)-2-methyl-2-propanol | 90-3      | 47        | 60447  | 23799  | 23799  | 35106  | 0.006±0.008  | 20697  | 23094  | 53421  | 38945  | 5.452±4.729  |              |
|    |                                         |           |           | 2.6665 | 0.1472 | 0.1472 | 12.943 |              | 1406.2 | 1516.5 | 1699.1 | 1409.3 |              |              |
| 15 | 1,1,1-Tris(hydroxymethyl)propane        | 77-99-6   | 39.3333   | 91405  | 23799  | 23799  | 9333   | 0.001±0.000  | 91746  | 76335  | 35934  | 62498  | 12.845±1.330 |              |
|    |                                         | 20521-44- |           | 15.525 | 0.1472 | 810.91 | 8.9573 |              | 36.105 | 76.692 | 176.58 | 147.23 |              |              |
| 16 | 1,11-Dodecadiyne                        | 2         | 31.25     | 77835  | 23799  | 7766   | 62986  | 0.001±0.000  | 21362  | 07166  | 51002  | 28329  | 0.252±0.203  |              |
|    |                                         |           |           | 0.1472 | 4.7015 | 0.1472 | 1.4355 |              | 2.8382 | 2.3060 | 5.6545 | 5.0955 |              |              |
| 17 | 1,2-Propanediol                         | 57-55-6   | 38.5833   | 23799  | 45597  | 23799  | 25938  | 0.720±0.471  | 36237  | 09696  | 39554  | 97131  | 0.3578±0.216 |              |
|    |                                         | 18368-95- |           | 79.769 | 65.542 | 194.89 | 36.010 |              | 4476.7 | 5801.2 | 5032.2 | 9103.8 |              |              |
| 18 | 1,3,8-p-Menthatriene                    | 1         | 22.9167   | 1598   | 43218  | 37868  | 95086  | 0.010±0.001  | 28175  | 98366  | 64162  | 36556  | 0.075±0.11   |              |
|    |                                         |           |           | 1.8636 | 1.3392 | 1.8111 | 0.1472 |              | 1072.0 | 1220.6 | 1451.4 | 1184.1 |              |              |
| 19 | 1,5-Diacetoxypentane                    | 6963-44-6 | 16.8333   | 33532  | 49182  | 93216  | 23799  | 0.570±0.185  | 53836  | 67204  | 26446  | 16093  | 0±0          |              |
|    |                                         |           |           | 142.63 | 59.924 | 86.399 | 27.331 |              | 10.797 | 18.613 | 24.101 | 0.1472 |              |              |
| 20 | 1,6-Octadiene, 3,7-dimethyl-            | 2436-90-0 | 24.6667   | 1315   | 77562  | 70932  | 64896  | 9.075±0.720  | 36504  | 82131  | 89941  | 23799  | 5.280±0.815  |              |
|    |                                         | 22460-59- |           | 1641.7 | 1245.4 | 58.807 | 0.1472 |              | 0.1472 | 50.603 | 225.99 | 0.1472 |              |              |
| 21 | 1,7-Octadien-3-ol, 2,6-dimethyl-        | 9         | 27.25     | 08592  | 42496  | 76225  | 23799  | 0.001±0.000  | 23799  | 72044  | 5166   | 23799  | 11.092±1.549 |              |

|    |                                                                 |           |         |        |        |        |        |             |  |        |        |        |        |             |
|----|-----------------------------------------------------------------|-----------|---------|--------|--------|--------|--------|-------------|--|--------|--------|--------|--------|-------------|
|    |                                                                 |           |         | 0.1472 | 0.1472 | 9.7534 | 10.909 |             |  | 232.46 | 432.99 | 447.24 | 421.83 |             |
| 22 | 1,8-Nonadiyne                                                   | 2396-65-8 | 19.25   | 23799  | 23799  | 57573  | 57956  | 0.117±0.010 |  | 0827   | 77538  | 7048   | 78121  | 0.092±0.032 |
|    |                                                                 |           |         | 21.169 | 13.416 | 16.269 | 120.99 |             |  | 116.34 | 135.90 | 170.75 | 126.67 |             |
| 23 | 1-Butanamine, 3-methyl-                                         | 107-85-7  | 37.3333 | 39644  | 48782  | 67135  | 89928  | 0.544±0.269 |  | 9696   | 5267   | 86464  | 73125  | 0.145±0.127 |
|    |                                                                 |           |         | 42.946 | 117.20 | 93.418 | 35.587 |             |  | 91.374 | 108.19 | 120.84 | 105.78 |             |
| 24 | 1-Butanol, 3-methoxy-                                           | 2517-43-3 | 45.9167 | 29397  | 96838  | 88362  | 31104  | 0.045±0.014 |  | 25567  | 48441  | 51473  | 78046  | 0.055±0.012 |
|    |                                                                 |           |         | 11.114 | 4.7952 | 6.2109 | 739.55 |             |  | 9233.6 | 5.4828 | 10776. | 3647.7 |             |
| 25 | 1-Butanol, 3-methyl-                                            | 123-51-3  | 17.3333 | 28485  | 88206  | 38768  | 19496  | 0.001±0.000 |  | 56557  | 9039   | 06932  | 80092  | 0.020±0.010 |
|    |                                                                 |           |         | 0.1472 | 0.1472 | 0.1472 | 12.141 |             |  | 293.64 | 335.35 | 383.17 | 331.89 |             |
| 26 | 1-Butene, 3-methyl-                                             | 563-45-1  | 28.6667 | 23799  | 23799  | 23799  | 77927  | 0.176±0.015 |  | 17536  | 47082  | 48571  | 22791  | 3.569±0.529 |
|    | 1H-Cyclopenta[1,3]cyclopropa[1,2]benzene, octahydro-7-methyl-3- | 13744-15- |         | 26.454 | 27.214 | 28.210 | 0.1472 |             |  | 49.892 | 36.904 | 44.089 | 56.751 |             |
| 27 | methylene-4-(1-methylethyl)-, (3aS,3bR,4S,7R,7aR)-              | 5         | 26.8333 | 78862  | 88997  | 52686  | 23799  | 0.690±0.097 |  | 15123  | 75149  | 9961   | 23839  | 0.492±0.176 |
|    |                                                                 |           |         | 127.65 | 87.280 | 1119.4 | 2.9305 |             |  | 42.032 | 42.930 | 6.3276 | 45.606 |             |
| 28 | 1-Heptanol                                                      | 111-70-6  | 26.0833 | 51562  | 43332  | 72554  | 55051  | 0.145±0.020 |  | 55326  | 11707  | 9501   | 6657   | 0.111±0.023 |
|    |                                                                 |           |         | 28.309 | 21.759 | 23.982 | 10.692 |             |  | 5.2421 | 6.8488 | 10.329 | 4.2242 |             |
| 29 | 1-Hexanol                                                       | 111-27-3  | 21.75   | 54163  | 79971  | 32225  | 68243  | 0.263±0.019 |  | 84186  | 81222  | 86725  | 83354  | 1.111±0.023 |
|    |                                                                 |           |         | 48.822 | 37.501 | 37.796 | 13.947 |             |  | 6.7466 | 13.240 | 11.475 | 13.908 |             |
| 30 | 1-Octanol                                                       | 111-87-5  | 27.25   | 22302  | 70191  | 50618  | 8477   | 0.001±0.000 |  | 45363  | 34592  | 68171  | 50707  | 0.056±0.007 |
|    |                                                                 |           |         | 9.9974 | 7.0778 | 0.1472 | 391.71 |             |  | 17.198 | 0.1472 | 20.379 | 14.386 |             |
| 31 | 1-Pentanol                                                      | 71-41-0   | 18.6667 | 06399  | 96548  | 23799  | 92175  | 0.020±0.004 |  | 61985  | 23799  | 64652  | 90751  | 0.046±0.005 |
|    |                                                                 |           |         | 2.8300 | 2.6569 | 3.6848 | 3.7078 |             |  | 10.169 | 15.146 | 14.194 | 14.552 |             |
| 32 | 1-Penten-3-ol                                                   | 616-25-1  | 15.6667 | 29615  | 63494  | 08408  | 44919  | 0.006±0.005 |  | 26981  | 70055  | 69352  | 30163  | 0±0         |
|    |                                                                 |           |         | 2.0733 | 21.937 | 0.6203 | 302.38 |             |  | 9.4266 | 0.1472 | 0.1472 | 0.1472 |             |
| 33 | 1-Propanol, 2-chloro-                                           | 78-89-7   | 11.75   | 59973  | 74805  | 96051  | 82031  | 0.238±0.045 |  | 83204  | 23799  | 23799  | 23799  | 0.366±0.017 |
|    |                                                                 |           |         | 52.197 | 30.205 | 34.800 | 0.8306 |             |  | 0.9627 | 2.6193 | 1.9720 | 1.1431 |             |
| 34 | 1-Propanol, 2-methyl-                                           | 78-83-1   | 13.5    | 1886   | 07261  | 77711  | 24452  | 0.296±0.082 |  | 9086   | 99588  | 82429  | 01774  | 0±0         |

|    |                                         |           |         |        |        |        |        |             |        |        |        |        |              |
|----|-----------------------------------------|-----------|---------|--------|--------|--------|--------|-------------|--------|--------|--------|--------|--------------|
|    |                                         |           |         | 68.894 | 30.446 | 43.181 | 1852.6 |             | 0.1472 | 1879.7 | 1995.7 | 0.1472 |              |
| 35 | 1-Propen-2-ol, acetate                  | 108-22-5  | 5.75    | 83168  | 79054  | 52478  | 225    | 3.914±1.252 | 23799  | 42812  | 11416  | 23799  | 0±0          |
|    |                                         |           |         | 862.03 | 385.14 | 0.1472 | 5029.9 |             | 2812.0 | 5212.6 | 6058.9 | 3857.5 |              |
| 36 | 1-Propene, 2-methyl-                    | 115-11-7  | 45.6667 | 26044  | 03858  | 23799  | 1458   | 0.053±0.016 | 23029  | 90767  | 59616  | 78254  | 0±0          |
|    |                                         |           |         | 9.2847 | 5.6748 | 11.424 | 8716.7 |             | 31301. | 18026. | 16557. | 27992. |              |
| 37 | 2(3H)-Furanone, 5-ethyldihydro-         | 695-06-7  | 30.6667 | 74444  | 33832  | 36863  | 38841  | 0.507±0.160 | 96853  | 89136  | 19937  | 31248  | 1.958±0.618  |
|    |                                         |           |         | 65.278 | 103.67 | 70.345 | 0.1472 |             | 112.32 | 123.62 | 125.60 | 128.56 |              |
| 38 | 2,4,6-Octatriene, 2,6-dimethyl-, (E,Z)- | 7216-56-0 | 22.75   | 63204  | 85338  | 93389  | 23799  | 0.050±0.004 | 77846  | 73357  | 6643   | 02609  | 0.649±0.157  |
|    |                                         |           |         | 8.6142 | 7.1601 | 8.6186 | 0.1472 |             | 10.935 | 14.200 | 15.196 | 11.760 |              |
| 39 | 2,4-Heptadienal, (E,E)-                 | 4313-03-5 | 25.5    | 94584  | 24593  | 77678  | 23799  | 0.985±0.158 | 22453  | 49835  | 58559  | 68996  | 11.220±3.359 |
|    |                                         |           |         | 145.88 | 128.47 | 176.11 | 33.996 |             | 10.808 | 11.432 | 11.693 | 10.524 |              |
| 40 | 2,4-Hexadienal, (E,E)-                  | 142-83-6  | 23      | 23182  | 4926   | 19894  | 76367  | 1.187±0.164 | 80181  | 62313  | 2094   | 58655  | 0.046±0.049  |
|    |                                         | 22410-74- |         | 188.63 | 164.34 | 212.38 | 3.9652 |             | 23.716 | 6.1139 | 6.4695 | 48.548 |              |
| 41 | 2,6-Octadien-1-ol, 2,7-dimethyl-        | 8         | 27.25   | 93839  | 85917  | 12124  | 64951  | 0.001±0.000 | 34428  | 68352  | 09574  | 19602  | 2.459±0.761  |
|    |                                         |           |         | 91.256 | 0.1472 | 0.1472 | 14.697 |             | 1.6342 | 0.1472 | 3.8760 | 0.1472 |              |
| 42 | 2,6-Octadien-1-ol, 3,7-dimethyl-, (Z)-  | 106-25-2  | 33.75   | 18352  | 23799  | 23799  | 47381  | 0.192±0.238 | 22189  | 23799  | 39907  | 23799  | 0±0          |
|    |                                         | 14898-79- |         | 12.799 | 5.4523 | 71.769 | 1.6193 |             | 4.7711 | 4.0887 | 8.3685 | 75.266 |              |
| 43 | 2-Butanol, (R)-                         | 4         | 37.75   | 7604   | 2149   | 40347  | 02488  | 0.080±0.092 | 12763  | 7289   | 76894  | 15396  | 4.228±0.302  |
|    |                                         |           |         | 0.1472 | 21.732 | 26.903 | 11.049 |             | 21.932 | 23.861 | 37.546 | 21.140 |              |
| 44 | 2-Butenal                               | 4170-30-3 | 11.6667 | 23799  | 6394   | 29789  | 32187  | 0.081±0.093 | 39309  | 06603  | 03809  | 3891   | 0.061±0.015  |
|    |                                         | 15798-64- |         | 26.144 | 0.1472 | 0.1472 | 0.1472 |             | 30050. | 37735. | 43986. | 27676. |              |
| 45 | 2-Butenal, (Z)-                         | 8         | 11.6667 | 70005  | 23799  | 23799  | 23799  | 0.077±0.006 | 28786  | 11617  | 11389  | 94027  | 0.089±0.020  |
|    |                                         |           |         | 13.401 | 11.425 | 12.991 | 907.14 |             | 42.910 | 34.797 | 42.770 | 34.414 |              |
| 46 | 2-Butenal, 3-methyl-                    | 107-86-8  | 16.9167 | 81153  | 3034   | 41832  | 31141  | 0.226±0.007 | 21743  | 28741  | 74968  | 84818  | 34.540±7.498 |
|    |                                         |           |         | 38.526 | 35.418 | 34.075 | 6.8885 |             | 12.922 | 15.730 | 23.341 | 13.134 |              |
| 47 | 2-Butene, 1-bromo-3-methyl-             | 870-63-3  | 20.25   | 58903  | 1373   | 80274  | 60045  | 0.008±0.005 | 62664  | 72479  | 14269  | 95662  | 0.006±0.002  |

|    |                                                                           |           |         |        |        |        |        |             |        |        |        |        |              |
|----|---------------------------------------------------------------------------|-----------|---------|--------|--------|--------|--------|-------------|--------|--------|--------|--------|--------------|
|    |                                                                           |           |         | 1.8814 | 0.3571 | 1.9733 | 14337. |             | 16082. | 9835.0 | 0.1472 | 14094. |              |
| 48 | 2-Butenoic acid, ethyl ester, (E)-                                        | 623-70-1  | 15.8333 | 55414  | 93178  | 66082  | 15039  | 0.123±0.018 | 18799  | 80153  | 23799  | 98764  | 1.006±0.002  |
|    |                                                                           |           |         | 20.128 | 15.076 | 21.485 | 19.189 |             | 49.659 | 61.419 | 62.934 | 63.031 |              |
| 49 | 2-Caren-10-al                                                             | 6909-19-9 | 32.75   | 4465   | 07918  | 10865  | 06189  | 0.525±0.063 | 83018  | 29124  | 47046  | 45323  | 2.006±0.002  |
|    |                                                                           |           |         | 92.875 | 66.239 | 90.949 | 61.779 |             | 216.50 | 127.70 | 380.72 | 128.37 |              |
| 50 | 2-Cyclohexen-1-one, 4-(1-methylethyl)-                                    | 500-02-7  | 30.0833 | 60254  | 1951   | 53527  | 81111  | 0.089±0.043 | 98664  | 87187  | 29491  | 44809  | 1.015±0.029  |
|    |                                                                           |           |         | 17.896 | 5.6047 | 11.666 | 3.2159 |             | 1.2197 | 0.1472 | 0.1472 | 0.1472 | 52.449±17.57 |
| 51 | 2-Furanmethanol, 5-ethenyltetrahydro- $\alpha,\alpha,5$ -trimethyl-, cis- | 5989-33-3 | 27.0833 | 51436  | 79581  | 12235  | 23543  | 1.23±0.198  | 78249  | 23799  | 23799  | 23799  | 6            |
|    |                                                                           |           |         | 0.1472 | 219.39 | 165.26 | 14.747 |             | 0.7531 | 1.0432 | 1.1896 | 1.1178 |              |
| 52 | 2-Heptanone, 6-methyl-5-methylene-                                        | 498-51-1  | 28.3333 | 23799  | 82243  | 91584  | 01234  | 0.001±0.000 | 57894  | 5052   | 5725   | 79729  | 0.045±0.005  |
|    |                                                                           | 154264-   |         | 37.077 | 27.299 | 0.1472 | 38.680 |             | 7.0477 | 0.1472 | 0.1472 | 4.4913 |              |
| 53 | 2-Heptanone, 7,7,7-trichloro-                                             | 40-1      | 16.4167 | 17738  | 53519  | 23799  | 19492  | 0.031±0.005 | 72515  | 23799  | 23799  | 09666  | 0.029±0.002  |
|    |                                                                           | 18829-55- |         | 4.8535 | 3.9715 | 4.8007 | 0.1472 |             | 15.593 | 0.1472 | 16.699 | 16.550 |              |
| 54 | 2-Heptenal, (E)-                                                          | 5         | 20.8333 | 1265   | 13498  | 08762  | 23799  | 0.135±0.014 | 08232  | 23799  | 8031   | 5721   | 0.203±0.008  |
|    |                                                                           |           |         | 25.879 | 21.502 | 19.978 | 1241.4 |             | 0.1472 | 30.524 | 4103.4 | 0.1472 |              |
| 55 | 2-Hexenal                                                                 | 505-57-7  | 17.6667 | 50072  | 96342  | 13893  | 92873  | 0.126±0.038 | 23799  | 22076  | 57097  | 23799  | 0.572±0.067  |
|    |                                                                           | 75697-98- |         | 21.945 | 11.169 | 21.253 | 0.8133 |             | 0.1472 | 4.9222 | 0.1472 | 0.1472 |              |
| 56 | 2-Isopropenyl-5-methylhex-4-enal                                          | 2         | 30.1667 | 48767  | 21424  | 87013  | 99849  | 0.001±0.000 | 23799  | 42207  | 23799  | 23799  | 1.875±0.575  |
|    |                                                                           |           |         | 8.1117 | 3.2689 | 0.1472 | 370.27 |             | 34.172 | 39.581 | 38.979 | 34.636 |              |
| 57 | 2-Isopropylmalic acid                                                     | 3237-44-3 | 38.5    | 54023  | 05397  | 23799  | 8193   | 0.438±0.039 | 02799  | 98795  | 69733  | 7129   | 0.063±0.008  |
|    |                                                                           | 134225-   |         | 78.646 | 59.346 | 71.429 | 337.48 |             | 895.46 | 1137.4 | 1308.8 | 1138.7 |              |
| 58 | 2-Nonen-4-yn-1-ol, (Z)-                                                   | 90-4      | 27.0833 | 13797  | 71818  | 90631  | 44943  | 0.516±0.054 | 43055  | 1634   | 54414  | 64624  | 0.316±0.197  |
|    |                                                                           |           |         | 83.001 | 83.758 | 70.698 | 7.3157 |             | 2555.9 | 3706.9 | 3218.9 | 667.37 |              |
| 59 | 2-Octanone                                                                | 111-13-7  | 28      | 79362  | 55912  | 09707  | 58671  | 0.001±0.000 | 9639   | 62655  | 98278  | 73232  | 0.015±0.009  |
|    |                                                                           |           |         | 22.164 | 22.285 | 0.1472 | 23.314 |             | 0.1472 | 14.662 | 3.4772 | 14.183 |              |
| 60 | 2-Octenal, (E)-                                                           | 2548-87-0 | 23.75   | 64207  | 99767  | 23799  | 04589  | 0.018±0.012 | 23799  | 7409   | 39142  | 19672  | 0±0          |

|    |                                   |           |         |        |        |        |        |             |        |        |        |        |             |
|----|-----------------------------------|-----------|---------|--------|--------|--------|--------|-------------|--------|--------|--------|--------|-------------|
|    |                                   |           |         | 1.5342 | 1.0232 | 3.7435 | 930.24 |             | 953.39 | 7336.2 | 2443.8 | 8004.9 |             |
| 61 | 2-Pentanol                        | 6032-29-7 | 32.3333 | 02441  | 44739  | 50068  | 24455  | 0.394±0.570 | 00791  | 42621  | 50665  | 79829  | 0.605±0.363 |
|    |                                   | 19872-52- |         | 15.573 | 0.1472 | 190.61 | 2.4444 |             | 25.994 | 16.221 | 21.673 | 47.429 |             |
| 62 | 2-Pentanone, 4-mercapto-4-methyl- | 7         | 21      | 16144  | 23799  | 41056  | 7011   | 0.176±0.045 | 30226  | 92348  | 93628  | 86988  | 0±0         |
|    |                                   |           |         | 19.684 | 30.095 | 26.753 | 35.021 |             | 10.390 | 0.1472 | 0.1472 | 17.523 |             |
| 63 | 2-Pentanone, 5-bromo-             | 3884-71-7 | 19.6667 | 60258  | 33267  | 98223  | 46148  | 0.057±0.027 | 46319  | 23799  | 23799  | 66687  | 0.060±0.007 |
|    |                                   |           |         | 3.5778 | 8.4780 | 10.423 | 403.69 |             | 66.617 | 81.139 | 88.871 | 68.959 |             |
| 64 | 2-Penten-1-ol, (Z)-               | 1576-95-0 | 24.0833 | 18728  | 14699  | 22721  | 45872  | 0.025±0.006 | 7214   | 78004  | 35927  | 67546  | 0.156±0.015 |
|    |                                   |           |         | 5.0157 | 4.0498 | 0.1472 | 89.284 |             | 33.799 | 41.091 | 47.467 | 36.458 |             |
| 65 | 2-Pentenal, (E)-                  | 1576-87-0 | 14.6667 | 34349  | 30107  | 23799  | 93982  | 0.132±0.061 | 00371  | 7792   | 15564  | 87546  | 0.423±0.031 |
|    |                                   |           |         | 32.322 | 21.367 | 10.234 | 31.004 |             | 0.8986 | 0.1472 | 0.9237 | 0.1472 |             |
| 66 | 2-Pentenal, 2-ethyl-              | 3491-57-4 | 16      | 38458  | 16189  | 86197  | 99722  | 0.001±0.000 | 83108  | 23799  | 33864  | 23799  | 0.724±0.548 |
|    |                                   |           |         | 0.1472 | 0.1472 | 9.0778 | 99.845 |             | 7733.5 | 12412. | 6174.5 | 8973.6 |             |
| 67 | 2-Propanol, 1-(1-methylethoxy)-   | 3944-36-3 | 43.5    | 23799  | 23799  | 56789  | 28226  | 0.001±0.000 | 45188  | 56128  | 0164   | 79494  | 0.410±0.301 |
|    |                                   | 19686-73- |         | 0.1472 | 71.049 | 0.1472 | 6.1294 |             | 7.6970 | 8.1599 | 8.8670 | 8.3879 |             |
| 68 | 2-Propanol, 1-bromo-              | 8         | 46.75   | 23799  | 42587  | 23799  | 91244  | 0.101±0.088 | 72143  | 76039  | 35694  | 29637  | 0.001±0.000 |
|    |                                   |           |         | 32.315 | 1.8975 | 16.015 | 52.190 |             | 0.1472 | 13.956 | 0.1472 | 0.1472 |             |
| 69 | 2-Propanol, 1-propoxy-            | 1569-01-3 | 47.25   | 32881  | 29704  | 53839  | 49974  | 0.001±0.000 | 23799  | 55795  | 23799  | 23799  | 0.047±0.005 |
|    |                                   |           |         | 36.936 | 0.2944 | 0.1472 | 40.164 |             | 196.23 | 237.55 | 60.462 | 26.737 |             |
| 70 | 2-Propanone, 1-hydroxy-           | 116-09-6  | 5.91667 | 54875  | 47598  | 23799  | 87978  | 0.001±0.000 | 77837  | 58725  | 32728  | 59989  | 0.983±0.983 |
|    |                                   |           |         | 0.1472 | 1262.6 | 0.1472 | 18.818 |             | 29.759 | 33.468 | 41.071 | 24.002 |             |
| 71 | 2-Propenal                        | 107-02-8  | 44.5    | 23799  | 70524  | 23799  | 2347   | 0.376±0.012 | 72081  | 92448  | 75724  | 68202  | 0±0         |
|    |                                   | 58175-57- |         | 67.147 | 54.608 | 58.438 | 0.1472 |             | 128.15 | 15.672 | 177.88 | 28.217 |             |
| 72 | 2-Propyl-1-pentanol               | 8         | 25.6667 | 31409  | 7391   | 63138  | 23799  | 0.041±0.010 | 88136  | 36007  | 95076  | 59081  | 0±0         |
|    |                                   |           |         | 7.4091 | 8.2119 | 4.9039 | 0.1472 |             | 11.366 | 13.572 | 22.873 | 14.744 |             |
| 73 | 2-Undecanone                      | 112-12-9  | 32.8333 | 58282  | 9313   | 48783  | 23799  | 0.027±0.010 | 05087  | 05962  | 03659  | 55462  | 0±0         |

|    |                                    |           |           |       |        |        |        |               |        |        |        |        |             |  |
|----|------------------------------------|-----------|-----------|-------|--------|--------|--------|---------------|--------|--------|--------|--------|-------------|--|
|    |                                    |           | 30086-02- |       | 2.7819 | 4.5134 | 5.5785 | 760.14        |        | 116.58 | 280.51 | 160.16 | 139.97      |  |
| 74 | 3,5-Octadien-2-one, (E,E)-         | 3         | 26.1667   | 77443 | 45098  | 93641  | 29898  | 32.914±15.423 | 25116  | 56244  | 69871  | 57288  | 0±0         |  |
|    |                                    |           | 56805-23- |       | 5176.1 | 6203.8 | 1938.8 | 945.54        | 15.209 | 16.287 | 29.648 | 29.260 |             |  |
| 75 | 3,6-Nonadien-1-ol, (E,Z)-          | 3         | 25.4167   | 15285 | 71978  | 35832  | 80475  | 0.095±0.058   | 23948  | 90427  | 43394  | 25081  | 0.036±0.022 |  |
|    |                                    |           | 59906-54- |       | 7.9354 | 6.5783 | 22.246 | 0.1472        | 311.60 | 607.44 | 807.23 | 252.41 |             |  |
| 76 | 3-Hexanone, 2,5-dimethyl-4-nitro-  | 6         | 19.5      | 81626 | 31508  | 26483  | 23799  | 5.464±0.614   | 47827  | 54531  | 14298  | 27788  | 0.076±0.019 |  |
|    |                                    |           |           |       | 0.1472 | 3.8399 | 775.79 | 209.45        | 44.194 | 29.272 | 0.1472 | 11.144 |             |  |
| 77 | 3-Hexen-1-ol, (Z)-                 | 928-96-1  | 22.6667   | 23799 | 74995  | 15439  | 70093  | 5.231±0.372   | 9071   | 24473  | 23799  | 27508  | 0.181±0.017 |  |
|    |                                    |           |           |       | 880.15 | 851.61 | 832.25 | 0.1472        | 129.24 | 122.88 | 0.1472 | 36.217 |             |  |
| 78 | 3-Hexen-1-ol, acetate, (E)-        | 3681-82-1 | 26.0833   | 61805 | 26585  | 20773  | 23799  | 0.001±0.000   | 50598  | 96328  | 23799  | 7408   | 0.151±0.051 |  |
|    |                                    |           |           |       | 0.1472 | 0.1472 | 148.49 | 176.18        | 3870.3 | 2466.4 | 3693.0 | 2815.3 |             |  |
| 79 | 3-Hexen-1-ol, acetate, (Z)-        | 3681-71-8 | 26.6667   | 23799 | 23799  | 21293  | 14963  | 0.016±0.018   | 62319  | 56725  | 9912   | 44497  | 0.073±0.070 |  |
|    |                                    |           |           |       | 4.3049 | 0.1472 | 5.7481 | 772.85        | 0.1472 | 0.1472 | 12.465 | 0.1472 |             |  |
| 80 | 3-Hydroxy-2-butanone               | 513-86-0  | 35.25     | 2716  | 23799  | 27138  | 171    | 0.216±0.046   | 23799  | 23799  | 01113  | 23799  | 0.126±0.119 |  |
|    |                                    |           |           |       | 29.546 | 27.776 | 41.333 | 38.015        | 228.85 | 190.36 | 222.87 | 210.81 |             |  |
| 81 | 3-Isopropyl-4-methyl-1-pentyn-3-ol | 5333-87-9 | 35.8333   | 06391 | 77428  | 14604  | 22085  | 0.470±0.885   | 97889  | 37736  | 5077   | 1731   | 0.161±0.180 |  |
|    |                                    |           |           |       | 7.5027 | 0.1472 | 277.13 | 1.1408        | 30.191 | 46.590 | 3.4117 | 86.033 |             |  |
| 82 | 3-Methyl-3-nitrobut-1-ene          | 1809-67-2 | 31.1667   | 68778 | 23799  | 24931  | 09659  | 0.001±0.000   | 96902  | 27876  | 27896  | 88399  | 0.305±0.269 |  |
|    |                                    |           |           |       | 0.1472 | 14.223 | 0.1472 | 0.1472        | 2.3513 | 8.3580 | 3.8171 | 3.5613 |             |  |
| 83 | 3-Nonanone                         | 925-78-0  | 21.75     | 23799 | 69386  | 23799  | 23799  | 0.001±0.000   | 38792  | 69217  | 05079  | 67654  | 0.060±0.014 |  |
|    |                                    |           | 20184-89- |       | 22.057 | 0.1472 | 1.0517 | 20.030        | 16.809 | 17.104 | 21.053 | 19.855 |             |  |
| 84 | 3-Nonyne                           | 8         | 30.75     | 285   | 23799  | 57712  | 93216  | 0.582±0.650   | 46045  | 10547  | 30786  | 32962  | 0.774±0.181 |  |
|    |                                    |           |           |       | 15.878 | 65.257 | 41.502 | 5.6872        | 6.3613 | 6.6178 | 8.8284 | 4.0989 |             |  |
| 85 | 3-Penten-1-ol, 4-methyl-           | 763-89-3  | 41.1667   | 74892 | 16107  | 24937  | 03297  | 0.001±0.000   | 18829  | 35354  | 20313  | 91542  | 0.163±0.037 |  |
|    |                                    |           |           |       | 3.2592 | 0.1472 | 2.5584 | 32.705        | 74.634 | 88.904 | 111.02 | 89.938 |             |  |
| 86 | 3-Penten-2-one, (E)-               | 3102-33-8 | 14.5833   | 14582 | 23799  | 88459  | 86746  | 0.200±0.026   | 71409  | 62541  | 84937  | 1673   | 0.106±0.080 |  |

|    |                                      |           |         |        |        |        |        |               |        |        |        |        |              |
|----|--------------------------------------|-----------|---------|--------|--------|--------|--------|---------------|--------|--------|--------|--------|--------------|
|    |                                      |           |         | 0.1472 | 26.259 | 31.028 | 281.26 |               | 3721.6 | 5921.6 | 5519.7 | 4915.1 |              |
| 87 | 3-Phenyl-1-propanol, acetate         | 122-72-5  | 35.6667 | 23799  | 40096  | 11909  | 95111  | 1.550±0.209   | 06124  | 89929  | 395    | 83098  | 9.748±0.463  |
|    |                                      |           |         | 275.93 | 268.88 | 196.81 | 13.614 |               | 14.633 | 18.549 | 21.002 | 15.779 |              |
| 88 | 4-Carene, (1S,3S,6R)-(-)-            | 5208-50-4 | 25      | 62509  | 24993  | 27129  | 93361  | 0.339±0.022   | 38248  | 42406  | 88865  | 17928  | 0±0          |
|    |                                      |           |         | 63.761 | 48.728 | 52.270 | 79.041 |               | 0.1472 | 24.497 | 41.227 | 0.1472 |              |
| 89 | 4-Hexen-1-ol, (E)-                   | 928-92-7  | 20.9167 | 21744  | 57687  | 94827  | 23589  | 0.001±0.000   | 23799  | 9503   | 23052  | 23799  | 0.074±0.066  |
|    |                                      |           |         | 17.275 | 0.1472 | 0.1472 | 0.1472 |               | 219.16 | 367.88 | 365.48 | 384.87 |              |
| 90 | 4-Penten-1-ol                        | 821-09-0  | 16.5    | 42483  | 23799  | 23799  | 23799  | 0.114±0.018   | 5547   | 39908  | 90971  | 3975   | 0±0          |
|    |                                      |           |         | 23.350 | 15.842 | 15.856 | 0.1472 |               | 11.024 | 7685.9 | 0.1472 | 5.5489 |              |
| 91 | 5-Hepten-1-ol, 2,6-dimethyl-         | 4234-93-9 | 43      | 37503  | 45687  | 37669  | 23799  | 0.001±0.000   | 06044  | 00079  | 23799  | 98733  | 0.025±0.004  |
|    |                                      | 609306-   |         | 17.109 | 0.1472 | 29.235 | 246.94 |               | 2256.6 | 2819.6 | 3307.4 | 640.26 |              |
| 92 | 5-Octen-2-yn-4-ol                    | 99-2      | 28.5833 | 18865  | 23799  | 51864  | 01181  | 0.082±0.015   | 11336  | 88456  | 93854  | 00534  | 0±0          |
|    |                                      | 41446-66- |         | 11.512 | 14.097 | 15.019 | 1759.9 |               | 4173.1 | 8806.5 | 12780. | 14596. |              |
| 93 | 5-Tetradecene, (E)-                  | 6         | 28.5833 | 50962  | 5171   | 27219  | 28987  | 54.239±34.005 | 04962  | 2231   | 31617  | 41588  | 0±0          |
|    |                                      |           |         | 953.76 | 10289. | 9164.0 | 28394. |               | 881.53 | 1081.5 | 0.1472 | 843.88 |              |
| 94 | 6-Octen-1-ol, 3,7-dimethyl-, acetate | 150-84-5  | 29.4167 | 64509  | 34889  | 85961  | 01877  | 146.851±4.667 | 37591  | 41622  | 23799  | 90816  | 0±0          |
|    |                                      |           |         | 32609. | 26299. | 18761. | 16361. |               | 0.1472 | 0.1472 | 697.72 | 0.1472 |              |
| 95 | 6-Octenal, 3,7-dimethyl-, (R)-       | 2385-77-5 | 25.3333 | 66254  | 68356  | 81265  | 28529  | 0.048±0.021   | 23799  | 23799  | 94241  | 23799  | 0.6060±0.293 |
|    |                                      | 31499-72- |         | 11.756 | 8.0847 | 2.9943 | 5601.1 |               | 2849.7 | 1651.6 | 0.1472 | 6173.6 |              |
| 96 | 7,8-Dihydro- $\alpha$ -ionone        | 6         | 36.9167 | 48084  | 61601  | 42973  | 57484  | 5.914±1.876   | 4058   | 12917  | 23799  | 1725   | 5.0300±1.507 |
|    |                                      |           |         | 19.314 | 25.272 | 27.410 | 7681.2 |               | 0.1472 | 15.559 | 0.1472 | 18.875 |              |
| 97 | Acetaldehyde                         | 59-66-5   | 47.1667 | 66168  | 66442  | 51229  | 34616  | 0.125±0.044   | 23799  | 62718  | 23799  | 68753  | 0.304±0.128  |
|    |                                      |           |         | 28.081 | 16.860 | 10.522 | 5428.4 |               | 7.2975 | 0.1472 | 4.8594 | 9.9971 |              |
| 98 | Acetaldehyde, tetramer               | 108-62-3  | 44.8333 | 44588  | 35305  | 64352  | 99581  | 0.333±0.362   | 88739  | 23799  | 67416  | 55638  | 0.399±0.263  |
|    |                                      |           |         | 333.19 | 256.15 | 285.75 | 7.5236 |               | 101.69 | 221.52 | 224.36 | 223.74 |              |
| 99 | Acetic acid                          | 64-19-7   | 24.0833 | 01095  | 39847  | 04539  | 40175  | 1.810±0.106   | 65928  | 33705  | 05044  | 53576  | 17.155±2.362 |



|     |                                    |           |         |        |        |        |        |              |        |        |        |        |             |
|-----|------------------------------------|-----------|---------|--------|--------|--------|--------|--------------|--------|--------|--------|--------|-------------|
|     |                                    |           |         | 103.48 | 80.760 | 106.10 | 14.003 |              | 170.52 | 0.1472 | 0.1472 | 176.65 |             |
| 100 | Acetic acid, 2-phenylethyl ester   | 103-45-7  | 33      | 40623  | 77335  | 89462  | 64972  | 0.628±0.075  | 70516  | 23799  | 23799  | 59482  | 2.531±0.262 |
|     |                                    |           |         | 756.60 | 634.53 | 695.62 | 1100.7 |              | 109.43 | 352.09 | 182.13 | 231.52 |             |
| 101 | Acetic acid, heptyl ester          | 112-06-1  | 22.1667 | 64437  | 55856  | 11271  | 9292   | 4.463±0.226  | 84847  | 86717  | 18034  | 95206  | 0.599±0.250 |
|     |                                    |           |         | 75.760 | 61.763 | 78.566 | 59.520 |              | 0.1472 | 1801.8 | 0.1472 | 0.1472 |             |
| 102 | Acetic acid, hexyl ester           | 142-92-7  | 17.9167 | 20969  | 32615  | 03817  | 92068  | 0.436±0.054  | 23799  | 12488  | 23799  | 23799  | 0.730±0.368 |
|     |                                    |           |         | 28.340 | 2.6221 | 25.888 | 99.285 |              | 198.09 | 792.45 | 575.48 | 234.43 |             |
| 103 | Acetic acid, hydroxy-, ethyl ester | 623-50-7  | 41.3333 | 07605  | 12163  | 8213   | 98089  | 0.090±0.088  | 36939  | 777    | 37525  | 74215  | 0.017±0.003 |
|     |                                    |           |         | 5.9195 | 3.9753 | 0.1472 | 120.18 |              | 0.1472 | 195.19 | 105.49 | 147.91 |             |
| 104 | Acetic acid, octyl ester           | 112-14-1  | 29.9167 | 40957  | 37036  | 23799  | 90569  | 0.046±0.052  | 23799  | 76392  | 04748  | 51673  | 0±0         |
|     |                                    |           |         | 17.107 | 11.491 | 13.980 | 765.20 |              | 46.887 | 48.601 | 0.1472 | 0.1472 |             |
| 105 | Acetic acid, pentyl ester          | 628-63-7  | 14.5    | 66801  | 27042  | 56287  | 94431  | 0.085±0.012  | 80358  | 44859  | 23799  | 23799  | 1.154±0.062 |
|     |                                    |           |         | 28.689 | 18.848 | 18.689 | 0.1472 |              | 36.364 | 0.1472 | 0.1472 | 97.312 |             |
| 106 | Acetonitrile                       | 75-05-8   | 10.4167 | 82287  | 72474  | 69391  | 23799  | 0.131±0.024  | 17926  | 23799  | 23799  | 15584  | 0.145±0.011 |
|     |                                    |           |         | 0.1472 | 3.4894 | 0.1472 | 47.175 |              | 35.761 | 50.036 | 71.875 | 47.137 |             |
| 107 | Acetophenone                       | 98-86-2   | 29.4167 | 23799  | 83996  | 23799  | 34067  | 0.001±0.000  | 73949  | 13485  | 36439  | 84473  | 0.492±0.055 |
|     |                                    |           |         | 9.7656 | 5.2094 | 66.649 | 12.474 |              | 25.386 | 36.265 | 46.220 | 0.1472 |             |
| 108 | Allyl acetate                      | 591-87-7  | 33.1667 | 0029   | 60893  | 84555  | 97806  | 0.1471±0.190 | 4223   | 68043  | 50276  | 23799  | 0.561±0.363 |
|     |                                    | 14289-96- |         | 7736.7 | 4742.2 | 4319.5 | 3404.1 |              | 38315. | 32294. | 66718. | 30706. |             |
| 109 | Allyl methallyl ether              | 4         | 25.4167 | 90458  | 93131  | 11709  | 88549  | 34.561±7.346 | 71949  | 25003  | 43452  | 24479  | 0.026±0.009 |
|     |                                    |           |         | 0.1472 | 0.1472 | 0.1472 | 4.7905 |              | 44.758 | 4223.3 | 2423.3 | 35.753 |             |
| 110 | Aromandendrene                     | 489-39-4  | 29.5833 | 23799  | 23799  | 23799  | 74925  | 0.001±0.000  | 58548  | 29057  | 89741  | 1046   | 1.181±0.116 |
|     |                                    |           |         | 0.1472 | 0.1472 | 0.1472 | 1.8023 |              | 28.301 | 39.592 | 39.971 | 70.650 |             |
| 111 | Azulene                            | 275-51-4  | 31.5833 | 23799  | 23799  | 23799  | 67277  | 0.001±0.000  | 68675  | 09244  | 13458  | 22209  | 0.010±0.004 |
|     |                                    |           |         | 63.929 | 53.808 | 51.129 | 29.858 |              | 739.31 | 1052.1 | 1384.4 | 1034.1 |             |
| 112 | Benzaldehyde                       | 100-52-7  | 26.25   | 70417  | 5209   | 04673  | 82564  | 0.338±0.034  | 32162  | 0944   | 10718  | 79145  | 0.173±0.034 |

|     |                                                                    |           |         |        |        |        |        |              |        |        |        |        |             |
|-----|--------------------------------------------------------------------|-----------|---------|--------|--------|--------|--------|--------------|--------|--------|--------|--------|-------------|
|     |                                                                    |           |         | 8.6231 | 9.4280 | 8.4735 | 833.41 |              | 21262. | 22293. | 22324. | 28427. |             |
| 113 | Benzaldehyde, 4-(1-methylethyl)-                                   | 122-03-2  | 32.4167 | 75112  | 54064  | 20297  | 61664  | 0.064±0.018  | 91937  | 03071  | 01053  | 84713  | 0.551±0.034 |
|     |                                                                    |           |         | 289.80 | 256.94 | 313.50 | 22.259 |              | 245.21 | 293.76 | 341.31 | 305.93 |             |
| 114 | Benzene, 1-methyl-3-(1-methylethyl)-                               | 535-77-3  | 19.25   | 11881  | 07546  | 69636  | 35925  | 1.881±0.219  | 23966  | 796    | 11473  | 3661   | 3.828±0.189 |
|     |                                                                    |           |         | 32.186 | 30.886 | 38.173 | 0.1472 |              | 15.990 | 20.260 | 17.609 | 0.1472 |             |
| 115 | Benzene, 1-methyl-4-(1-methylethenyl)-                             | 1195-32-0 | 24      | 37868  | 58533  | 61903  | 23799  | 0.211±0.026  | 89658  | 77719  | 79394  | 23799  | 0.311±0.022 |
|     |                                                                    |           |         | 0.1472 | 359.01 | 505.51 | 44.100 |              | 31.416 | 22.910 | 71.504 | 12.264 |             |
| 116 | Benzeneacetic acid, methyl ester                                   | 101-41-7  | 31.75   | 23799  | 98628  | 40447  | 86765  | 3.129±0.689  | 63108  | 49024  | 47125  | 46125  | 0.575±0.059 |
|     |                                                                    |           |         | 28.882 | 28.590 | 28.900 | 1059.9 |              | 24.947 | 5.9668 | 21332. | 4.6042 |             |
| 117 | Benzoic acid, 2-methylpropyl ester                                 | 120-50-3  | 32.5833 | 82229  | 04525  | 32315  | 89781  | 0.187±0.014  | 93023  | 50046  | 57008  | 5086   | 0±0         |
|     |                                                                    |           |         | 34.241 | 43.274 | 45.352 | 1512.5 |              | 1165.7 | 1666.9 | 1429.3 | 1913.0 |             |
| 118 | Benzoic acid, methyl ester                                         | 93-58-3   | 28.6667 | 49099  | 76112  | 81536  | 72584  | 0.261±0.043  | 96184  | 48662  | 62984  | 24493  | 0.405±0.060 |
|     |                                                                    |           |         | 32.150 | 23.658 | 23.167 | 133.63 |              | 35.171 | 38.366 | 55.980 | 18.751 |             |
| 119 | Benzyl alcohol                                                     | 100-51-6  | 34.4167 | 85657  | 38418  | 25184  | 72487  | 0.165±0.016  | 0456   | 58413  | 24511  | 51174  | 0±0         |
|     |                                                                    |           |         | 2651.2 | 860.13 | 0.1472 | 7389.8 |              | 170.81 | 0.1472 | 0.1472 | 0.1472 |             |
| 120 | Bicyclo[2.2.1]heptane-2-methanol                                   | 5240-72-2 | 15.8333 | 83382  | 86652  | 23799  | 60479  | 10.888±4.893 | 86585  | 23799  | 23799  | 23799  | 0±0         |
|     |                                                                    | 17699-16- |         | 43.447 | 162.84 | 55.384 | 91.413 |              | 104.38 | 108.99 | 140.46 | 7.1050 |             |
| 121 | Bicyclo[3.1.0]hexan-2-ol, 2-methyl-5-(1-methylethyl)-, (1α,2α,5α)- | 0         | 24.6667 | 49637  | 74355  | 9732   | 57809  | 0.563±0.449  | 31218  | 83769  | 32783  | 27795  | 0.032±0.019 |
|     |                                                                    |           |         | 2.0555 | 1.5292 | 2.0241 | 187.52 |              | 2624.3 | 5016.5 | 3743.8 | 3040.7 |             |
| 122 | Butanal, 2-methyl-                                                 | 96-17-3   | 7.83333 | 38092  | 39475  | 25759  | 6436   | 0.011±0.001  | 49224  | 83951  | 25143  | 49748  | 0.030±0.003 |
|     |                                                                    |           |         | 5.3806 | 3.2435 | 3.4588 | 0.1472 |              | 3426.7 | 4111.8 | 5100.7 | 4601.3 |             |
| 123 | Butanal, 3-methyl-                                                 | 590-86-3  | 7.91667 | 26727  | 46988  | 7527   | 23799  | 0.026±0.005  | 81189  | 64582  | 43987  | 97867  | 0.034±0.004 |
|     |                                                                    |           |         | 0.1472 | 0.1472 | 0.1472 | 187.27 |              | 19.199 | 11545. | 1903.6 | 20205. |             |
| 124 | Butane, 2-bromo-2-methyl-                                          | 507-36-8  | 33.5    | 23799  | 23799  | 23799  | 44253  | 0.001±0.000  | 49881  | 27021  | 45604  | 07688  | 0.120±0.115 |
|     |                                                                    |           |         | 7.9611 | 5.1267 | 5.9556 | 1.9288 |              | 708.47 | 457.93 | 1065.3 | 3158.1 |             |
| 125 | Butanoic acid                                                      | 107-92-6  | 28.6667 | 50002  | 49412  | 10902  | 23385  | 0.042±0.006  | 39258  | 87934  | 72214  | 49663  | 0.108±0.047 |

|     |                                     |           |         |        |        |        |        |               |        |        |        |        |             |
|-----|-------------------------------------|-----------|---------|--------|--------|--------|--------|---------------|--------|--------|--------|--------|-------------|
|     |                                     |           |         | 368.65 | 285.54 | 316.16 | 22.245 |               | 3549.8 | 4428.7 | 3314.5 | 4860.4 |             |
| 126 | Butanoic acid, 2-methylpropyl ester | 539-90-2  | 15.75   | 74175  | 30176  | 66368  | 36129  | 1.992±0.126   | 93542  | 88406  | 34332  | 46499  | 0±0         |
|     |                                     |           |         | 9.1074 | 6.5567 | 7.7140 | 11.334 |               | 0.1472 | 2.1776 | 0.1472 | 0.5396 |             |
| 127 | Butyrolactone                       | 96-48-0   | 28.9167 | 68013  | 08741  | 84792  | 83271  | 0.045±0.008   | 23799  | 67637  | 23799  | 92245  | 0.028±0.004 |
|     |                                     |           |         | 14.761 | 11.313 | 11.808 | 0.1472 |               | 5.8713 | 8.7709 | 8.4329 | 6.5735 |             |
| 128 | Camphene                            | 79-92-5   | 12.5833 | 32304  | 05838  | 60313  | 23799  | 0.076±0.006   | 30364  | 20434  | 07758  | 04814  | 0.141±0.008 |
|     |                                     |           |         | 1379.3 | 1200.0 | 0.1472 | 42.451 |               | 102.06 | 119.88 | 150.38 | 100.11 |             |
| 129 | Caryophyllene                       | 87-44-5   | 28.3333 | 08698  | 17764  | 23799  | 48142  | 7.982±0.036   | 80097  | 59611  | 75998  | 44813  | 1.492±0.075 |
|     |                                     |           |         | 15.898 | 39.934 | 0.1472 | 7.6210 |               | 20.494 | 21.968 | 57.746 | 28.790 |             |
| 130 | CHF2CH2OH                           | 359-13-7  | 42.25   | 82135  | 21932  | 23799  | 56456  | 0.174±0.086   | 51248  | 88783  | 60368  | 70412  | 0.079±0.018 |
|     |                                     | 157477-   |         | 0.1472 | 8.8111 | 0.1472 | 7.1553 |               | 3.1454 | 4.4481 | 10.087 | 0.8327 |             |
| 131 | cis-Muurolo-4(15),5-diene           | 72-0      | 40.1667 | 23799  | 89905  | 23799  | 75315  | 0.001±0.000   | 21789  | 60818  | 97309  | 73897  | 0.044±0.022 |
|     |                                     |           |         | 27157. | 18395. | 32889. | 5.5966 | 167.513±38.15 | 7.8591 | 8.6391 | 8.1694 | 7.6439 |             |
| 132 | Citronellal                         | 106-23-0  | 25.3333 | 88648  | 82093  | 86264  | 67367  | 4             | 65223  | 09671  | 29451  | 90907  | 3.360±0.567 |
|     |                                     |           |         | 2936.6 | 2171.2 | 65.106 | 0.1472 |               | 106.72 | 140.99 | 153.40 | 177.04 |             |
| 133 | Citronellol                         | 106-22-9  | 32      | 60668  | 75261  | 88521  | 23799  | 15.979±1.418  | 82785  | 70232  | 71033  | 32814  | 0±0         |
|     |                                     |           |         | 105.41 | 95.133 | 105.50 | 13444. |               | 713.75 | 0.1472 | 0.1472 | 0.1472 |             |
| 134 | Copaene                             | 3856-25-5 | 25.75   | 94091  | 98073  | 80033  | 01843  | 0.637±0.032   | 87042  | 23799  | 23799  | 23799  | 1.522±0.941 |
|     |                                     |           |         | 2.5402 | 1.6899 | 0.1472 | 11.587 |               | 277.91 | 222.68 | 425.35 | 339.12 |             |
| 135 | Cycloheptylamine                    | 5452-35-7 | 11.0833 | 56771  | 15976  | 23799  | 50767  | 0.009±0.006   | 83539  | 31242  | 38977  | 18547  | 0.013±0.004 |
|     |                                     |           |         | 3.9872 | 0.1472 | 0.9508 | 19.493 |               | 305.85 | 0.1472 | 0.1472 | 362.51 |             |
| 136 | Cyclooctylamine                     | 5452-37-9 | 32.3333 | 96222  | 23799  | 11913  | 60047  | 0.010±0.009   | 53003  | 23799  | 23799  | 43715  | 0±0         |
|     |                                     |           |         | 0.1472 | 37.407 | 55.455 | 85.566 |               | 399.74 | 455.82 | 488.24 | 542.96 |             |
| 137 | Cyclopentane, nitro-                | 2562-38-1 | 33.75   | 23799  | 56377  | 85512  | 56085  | 0.354±0.104   | 38534  | 91425  | 3345   | 47123  | 0±0         |
|     |                                     |           |         | 1665.8 | 1683.1 | 1425.3 | 254.37 |               | 1830.1 | 2468.4 | 3174.2 | 2591.1 |             |
| 138 | Decanal                             | 112-31-2  | 25.6667 | 98359  | 70552  | 67574  | 93909  | 9.234±1.775   | 41845  | 94061  | 09243  | 66793  | 0.585±0.148 |

|     |                                                                                |           |         |        |        |        |        |               |        |        |        |        |              |
|-----|--------------------------------------------------------------------------------|-----------|---------|--------|--------|--------|--------|---------------|--------|--------|--------|--------|--------------|
|     |                                                                                |           |         | 80.055 | 0.1472 | 62.402 | 26.162 |               | 133.82 | 154.91 | 217.82 | 165.11 |              |
| 139 | Diethylene glycol                                                              | 111-46-6  | 44.75   | 58724  | 23799  | 61801  | 74849  | 0.218±0.252   | 89186  | 50484  | 21954  | 42957  | 0.216±0.039  |
|     |                                                                                |           |         | 0.1472 | 9528.8 | 3393.9 | 156.51 |               | 2458.8 | 0.1472 | 0.1472 | 2270.0 |              |
| 140 | D-Limonene                                                                     | 5989-27-5 | 25.3333 | 23799  | 63011  | 5675   | 62192  | 40.013±21.006 | 67768  | 23799  | 23799  | 02886  | 12.419±7.076 |
|     |                                                                                |           |         | 4.1043 | 2.4660 | 8.3460 | 7.1562 |               | 0.1472 | 0.1472 | 26.377 | 0.1472 |              |
| 141 | Dodecanoic acid, ethyl ester                                                   | 106-33-2  | 41.4167 | 24549  | 06328  | 47549  | 29427  | 0.032±0.016   | 23799  | 23799  | 00297  | 23799  | 0.015±0.006  |
|     |                                                                                | 54550-10- |         | 62.136 | 11.351 | 0.1472 | 0.1472 |               | 11.710 | 15.013 | 25.771 | 19.052 |              |
| 142 | Estran-3-one, 17-(acetyloxy)-2-methyl-, (2 $\alpha$ ,5 $\alpha$ ,17 $\beta$ )- | 6         | 27.5833 | 20248  | 24982  | 23799  | 23799  | 0.423±0.383   | 94687  | 00462  | 71953  | 83706  | 0.150±0.020  |
|     |                                                                                |           |         | 588.17 | 711.73 | 308.49 | 234.94 |               | 3723.5 | 3275.3 | 4307.7 | 9643.1 | 20.049±13.63 |
| 143 | Ethanamine, N,N-difluoro-                                                      | 758-18-9  | 43.6667 | 83507  | 058    | 51864  | 04536  | 2.987±1.354   | 42338  | 09325  | 41482  | 93474  | 3            |
|     |                                                                                |           |         | 11639. | 9410.2 | 10363. | 6.0389 |               | 19.137 | 5.3988 | 137.56 | 38.447 |              |
| 144 | Ethanol                                                                        | 64-17-5   | 8.58333 | 25465  | 27103  | 66546  | 07863  | 66.122±2.553  | 49295  | 87421  | 83895  | 02734  | 5.240±0.847  |
|     |                                                                                |           |         | 1390.4 | 706.01 | 625.50 | 0.1472 |               | 3354.8 | 0.1472 | 3861.0 | 9063.1 |              |
| 145 | Ethanol, 2-(vinylloxy)-                                                        | 75-07-0   | 47.1667 | 90743  | 09184  | 90127  | 23799  | 8.225±1.012   | 93403  | 23799  | 61776  | 72072  | 1.216±0.061  |
|     |                                                                                |           |         | 694.43 | 252.19 | 418.95 | 3.3831 |               | 1.5078 | 3.2967 | 4.7054 | 2.7149 |              |
| 146 | Ethanol, 2-[2-(ethenyloxy)ethoxy]-                                             | 929-37-3  | 44.5833 | 03397  | 01622  | 80893  | 39799  | 2.877±0.978   | 61298  | 01805  | 27459  | 03915  | 3.015±0.450  |
|     |                                                                                |           |         | 2.8192 | 1.6243 | 10.845 | 598.12 |               | 119.94 | 182.50 | 191.12 | 181.75 |              |
| 147 | Ethylmalonic acid                                                              | 601-75-2  | 19.6667 | 63495  | 88443  | 60316  | 78992  | 0.028±0.028   | 3872   | 88173  | 37067  | 11733  | 0.010±0.004  |
|     |                                                                                |           |         | 114.72 | 126.32 | 286.67 | 2643.2 |               | 0.1472 | 0.1472 | 0.1472 | 82.178 |              |
| 148 | Formaldehyde                                                                   | 50-00-0   | 47.0833 | 57766  | 46033  | 58859  | 30166  | 1.309±0.647   | 23799  | 23799  | 23799  | 92876  | 0.193±0.018  |
|     |                                                                                |           |         | 23.305 | 12.176 | 16.510 | 169.89 |               | 0.1472 | 10.430 | 12.799 | 20.589 |              |
| 149 | Formic acid                                                                    | 64-18-6   | 25.6667 | 85074  | 60668  | 27795  | 66989  | 0.103±0.025   | 23799  | 243    | 64966  | 67058  | 0±0          |
|     |                                                                                |           |         | 4.8397 | 3.9814 | 6.5952 | 134.92 |               | 120.98 | 0.1472 | 0.1472 | 140.18 |              |
| 150 | Furan, 2-pentyl-                                                               | 3777-69-3 | 18      | 05254  | 01959  | 68864  | 68163  | 0.029±0.010   | 21456  | 23799  | 23799  | 24901  | 0±0          |
|     |                                                                                |           |         | 66.514 | 50.004 | 34.183 | 1.4760 |               | 0.1472 | 6.4355 | 0.1472 | 1.7798 |              |
| 151 | Furan, 3-(4-methyl-3-pentenyl)-                                                | 539-52-6  | 23.4167 | 42441  | 49595  | 91799  | 01383  | 0.294±0.078   | 23799  | 02158  | 23799  | 28212  | 0.741±0.133  |

|     |                                         |           |         |        |        |        |        |             |        |        |        |        |              |
|-----|-----------------------------------------|-----------|---------|--------|--------|--------|--------|-------------|--------|--------|--------|--------|--------------|
|     |                                         |           |         | 1.5185 | 0.5075 | 1.4581 | 4.8982 |             | 0.1472 | 4.5499 | 0.1472 | 10.770 |              |
| 152 | Furfural                                | 98-01-1   | 23.5833 | 09453  | 63706  | 69701  | 40557  | 0.007±0.003 | 23799  | 59748  | 23799  | 78049  | 0.187±0.079  |
|     |                                         | 23986-74- |         | 238.64 | 205.30 | 204.22 | 14.460 |             | 134.18 | 168.17 | 183.55 | 157.10 |              |
| 153 | Germacrene D                            | 5         | 30.9167 | 55759  | 0004   | 10925  | 31523  | 1.384±0.060 | 43241  | 15313  | 55137  | 64823  | 13.312±1.973 |
|     |                                         |           |         | 46.001 | 30.643 | 0.1472 | 32.361 |             | 96.241 | 0.1472 | 0.1472 | 0.1472 |              |
| 154 | Heptanal                                | 111-71-7  | 16.5    | 86467  | 37314  | 23799  | 70755  | 0.227±0.035 | 99372  | 23799  | 23799  | 23799  | 0.038±0.005  |
|     |                                         | 16630-91- |         | 1496.5 | 1115.5 | 1257.4 | 21.693 |             | 14.195 | 16.685 | 14.301 | 12.131 |              |
| 155 | Heptanal, 2-methyl-                     | 4         | 17.1667 | 63175  | 41962  | 84913  | 08263  | 8.079±0.660 | 57043  | 14631  | 43385  | 2829   | 0.135±0.029  |
|     |                                         | 51209-78- |         | 81.099 | 64.042 | 70.600 | 0.1472 |             | 58.943 | 76.538 | 125.01 | 100.45 |              |
| 156 | Heptanoic acid, 2-methyl-, methyl ester | 0         | 19.75   | 1101   | 94598  | 21024  | 23799  | 0.478±0.057 | 09006  | 84542  | 0381   | 45697  | 0.136±0.013  |
|     |                                         |           |         | 176.63 | 125.84 | 118.59 | 5.7546 |             | 0.1472 | 0.1472 | 0.1472 | 119.09 |              |
| 157 | Hexanal                                 | 66-25-1   | 13.0833 | 81411  | 12114  | 19074  | 78188  | 0.846±0.125 | 23799  | 23799  | 23799  | 20986  | 0.471±0.049  |
|     |                                         |           |         | 242.37 | 180.93 | 28.629 | 110.51 |             | 539.34 | 749.67 | 922.35 | 767.31 |              |
| 158 | Hexane, 1-(ethenyloxy)-                 | 5363-64-4 | 22.9167 | 73441  | 67264  | 74826  | 63272  | 1.305±0.106 | 32733  | 4168   | 64421  | 5027   | 0.142±0.057  |
|     |                                         |           |         | 49.438 | 37.832 | 39.055 | 10.448 |             | 58.316 | 1390.1 | 158.85 | 297.14 |              |
| 159 | Hexanoic acid, 5-methyl-, methyl ester  | 2177-83-5 | 18.3333 | 99394  | 94338  | 26969  | 64349  | 0.248±0.020 | 78762  | 72603  | 63406  | 12114  | 0±0          |
|     |                                         |           |         | 16.850 | 11.923 | 13.303 | 7.1083 |             | 45.309 | 6.2042 | 80.793 | 7.5328 |              |
| 160 | Hexanoic acid, ethyl ester              | 123-66-0  | 18.0833 | 68013  | 68183  | 91056  | 04223  | 0.089±0.008 | 40521  | 3007   | 24086  | 35346  | 0.003±0.000  |
|     |                                         |           |         | 29.423 | 10.976 | 0.1472 | 2.9023 |             | 183.88 | 374.30 | 512.96 | 349.49 |              |
| 161 | Hexanoic acid, methyl ester             | 106-70-7  | 16.5833 | 25715  | 93862  | 23799  | 21886  | 0.112±0.052 | 95304  | 93885  | 9414   | 13145  | 0.006±0.006  |
|     |                                         |           |         | 234.12 | 210.12 | 250.02 | 34.638 |             | 643.49 | 564.53 | 1120.3 | 554.09 |              |
| 162 | Humulene                                | 6753-98-6 | 30.0833 | 81244  | 36831  | 75904  | 96141  | 1.490±0.133 | 7845   | 01911  | 17432  | 45535  | 8.546±0.939  |
|     |                                         | 19411-65- |         | 8.2564 | 0.1472 | 0.1472 | 73.027 |             | 9.4687 | 0.1472 | 3.8435 | 0.1472 |              |
| 163 | Hydroxylamine, O-(3-methylbutyl)-       | 5         | 41.5    | 57969  | 23799  | 23799  | 28709  | 0.028±0.032 | 21074  | 23799  | 79379  | 23799  | 0.614±0.486  |
|     |                                         |           |         | 22.334 | 12.012 | 15.692 | 26.338 |             | 10.971 | 0.1472 | 13.493 | 0.1472 |              |
| 164 | Isobutyl acetate                        | 110-19-0  | 10.8333 | 89274  | 67797  | 00519  | 55332  | 0.098±0.024 | 38946  | 23799  | 9677   | 23799  | 5.200±0.515  |

|     |                        |           |         |        |        |        |        |              |        |        |        |        |              |
|-----|------------------------|-----------|---------|--------|--------|--------|--------|--------------|--------|--------|--------|--------|--------------|
|     |                        |           |         | 0.1472 | 5.2509 | 0.1472 | 0.1472 |              | 36.531 | 15.095 | 0.1472 | 4.7651 |              |
| 165 | Isoprene               | 78-79-5   | 23.9167 | 23799  | 92428  | 23799  | 23799  | 0.018±0.020  | 58889  | 12243  | 23799  | 06498  | 0.022±0.006  |
|     |                        |           |         | 6731.9 | 4310.1 | 5924.2 | 42.681 |              | 33.047 | 43.773 | 56.472 | 48.450 |              |
| 166 | Isopulegol             | 89-79-2   | 27.75   | 28795  | 46958  | 6661   | 3326   | 38.046±7.226 | 08223  | 31384  | 04318  | 6559   | 0±0          |
|     |                        | 58461-27- |         | 3474.8 | 0.1472 | 9.3267 | 36.073 |              | 0.1472 | 0.1472 | 52.606 | 15.439 |              |
| 167 | Lavandulol             | 1         | 26.5833 | 44262  | 23799  | 32154  | 77558  | 0.030±0.030  | 23799  | 23799  | 62672  | 83489  | 0.149±0.049  |
|     |                        |           |         | 7140.3 | 6825.6 | 5843.3 | 38.667 |              | 9.7671 | 75.626 | 24.306 | 0.1472 | 129.967±6.11 |
| 168 | Limonene               | 138-86-3  | 17.0833 | 44032  | 48066  | 20698  | 33578  | 41.528±3.653 | 8995   | 57619  | 86446  | 23799  | 3            |
|     |                        |           |         | 41.345 | 0.1472 | 33.818 | 51.410 |              | 10.598 | 8.7121 | 0.1472 | 0.1472 |              |
| 169 | Limonene oxide, trans- | 4959-35-7 | 24.6667 | 18344  | 23799  | 75421  | 55264  | 0.115±0.132  | 05608  | 78681  | 23799  | 23799  | 1.213±0.077  |
|     |                        |           |         | 3251.0 | 2772.1 | 2853.1 | 8.2060 |              | 145.97 | 271.93 | 212.03 | 71.313 | 158.365±46.8 |
| 170 | Linalool               | 78-70-6   | 26.5833 | 68218  | 46658  | 16312  | 28649  | 19.247±1.347 | 29792  | 37484  | 61275  | 13779  | 88           |
|     |                        | 60047-17- |         | 3.0514 | 0.1472 | 1.5087 | 19.746 |              | 30.965 | 30.730 | 27.222 | 16.007 |              |
| 171 | Linalool oxide         | 8         | 37.9167 | 95384  | 23799  | 38192  | 74045  | 0.011±0.008  | 96039  | 68407  | 15707  | 14491  | 0.037±0.034  |
|     |                        |           |         | 831.03 | 654.15 | 769.11 | 8.6813 |              | 0.1472 | 46.403 | 0.1472 | 0.1472 | 81.189±10.13 |
| 172 | Linalyl acetate        | 115-95-7  | 26.9167 | 29927  | 53466  | 73155  | 42282  | 4.837±0.370  | 23799  | 34576  | 23799  | 23799  | 4            |
|     |                        |           |         | 27.896 | 15.710 | 31.367 | 0.1472 |              | 0.1472 | 6.4419 | 24.091 | 0.1472 |              |
| 173 | Methacrolein           | 78-85-3   | 7       | 77956  | 30308  | 61625  | 23799  | 0.157±0.050  | 23799  | 87127  | 02303  | 23799  | 0.630±0.051  |
|     |                        |           |         | 107.24 | 84.662 | 84.091 | 2.5781 |              | 5.8496 | 3.0580 | 28.510 | 8.2819 |              |
| 174 | Methyl Alcohol         | 67-56-1   | 7.5     | 14988  | 54023  | 57791  | 86174  | 0.599±0.056  | 93226  | 39868  | 96647  | 82167  | 1.180±0.047  |
|     |                        |           |         | 91.069 | 78.650 | 111.82 | 0.1472 |              | 506.07 | 669.00 | 4.1705 | 381.73 |              |
| 175 | Methyl salicylate      | 119-36-8  | 32.3333 | 08418  | 66371  | 08438  | 23799  | 0.654±0.157  | 85832  | 65842  | 45419  | 24539  | 0±0          |
|     |                        |           |         | 3.9258 | 1.1914 | 4.4886 | 1.8169 |              | 7.8314 | 84.503 | 0.1472 | 134.33 |              |
| 176 | Methylene chloride     | 75-09-2   | 8.25    | 62433  | 05706  | 94477  | 34641  | 0.018±0.009  | 07865  | 2921   | 23799  | 77461  | 0.025±0.004  |
|     |                        | 24406-05- |         | 0.1472 | 3.5819 | 0.1472 | 1526.0 |              | 513.11 | 2537.4 | 0.9943 | 9832.5 |              |
| 177 | $\alpha$ -Cadinene     | 1         | 32.75   | 23799  | 08142  | 23799  | 96128  | 0.001±0.000  | 85046  | 11559  | 03894  | 18329  | 0.006±0.002  |

|     |                                         |           |         |        |        |        |        |             |        |        |        |        |             |
|-----|-----------------------------------------|-----------|---------|--------|--------|--------|--------|-------------|--------|--------|--------|--------|-------------|
|     |                                         |           |         | 9.4448 | 5.0000 | 6.2387 | 0.1472 |             | 57.195 | 199.79 | 87.396 | 111.94 |             |
| 178 | Nerolidol                               | 142-50-7  | 37.4167 | 67249  | 89216  | 56218  | 23799  | 0.001±0.000 | 11834  | 93279  | 30232  | 04212  | 0.304±0.064 |
|     |                                         | 80556-89- |         | 7.1069 | 226.06 | 154.33 | 8.2760 |             | 0.1472 | 45.060 | 34.975 | 61.129 |             |
| 179 | N-Nitroso(2-hydroxyethyl)glycine        | 4         | 45.75   | 16204  | 4629   | 60402  | 65878  | 0.046±0.011 | 23799  | 65557  | 35824  | 53246  | 0±0         |
|     |                                         | 36393-56- |         | 140.05 | 158.28 | 83.022 | 76.237 |             | 207.82 | 92.163 | 0.1472 | 195.51 |             |
| 180 | Norpseudoephedrine                      | 3         | 3.75    | 38939  | 44294  | 54709  | 94361  | 0.741±0.640 | 23697  | 09606  | 23799  | 17705  | 0.489±0.266 |
|     |                                         |           |         | 455.33 | 287.79 | 103.76 | 26.361 |             | 2.1355 | 0.1472 | 0.1472 | 2.1505 |             |
| 181 | Octanal                                 | 124-13-0  | 19.75   | 73919  | 77624  | 77398  | 66181  | 0.784±0.211 | 23787  | 23799  | 23799  | 69955  | 0.902±0.107 |
|     |                                         |           |         | 30.557 | 14.152 | 30.875 | 246.10 |             | 179.16 | 298.27 | 199.28 | 221.73 |             |
| 182 | Octanoic acid, 2-methyl-, methyl ester  | 2177-86-8 | 14.9167 | 83584  | 98038  | 3621   | 74532  | 2.357±0.396 | 88631  | 0866   | 91735  | 84566  | 0.263±0.028 |
|     |                                         |           |         | 32.165 | 0.1472 | 25.337 | 1.6856 |             | 4.6435 | 4.3345 | 1500.8 | 0.1472 |             |
| 183 | Oxirane, 2,3-dimethyl-, cis-            | 1758-33-4 | 41.0833 | 4547   | 23799  | 72989  | 86013  | 0.140±0.058 | 77284  | 98455  | 50845  | 23799  | 0.038±0.009 |
|     |                                         |           |         | 5.2031 | 45.323 | 12.479 | 5.3878 |             | 5.2602 | 0.1472 | 3.6622 | 3.8066 |             |
| 184 | Paraldehyde                             | 123-63-7  | 46.6667 | 98645  | 14919  | 90225  | 843    | 0.172±0.013 | 35742  | 23799  | 21991  | 68783  | 0±0         |
|     |                                         | 20902-45- |         | 26.860 | 0.1472 | 0.1472 | 0.1472 |             | 0.1472 | 45.346 | 59.817 | 0.5026 |             |
| 185 | Penicillamine disulfide                 | 8         | 44.75   | 61659  | 23799  | 23799  | 23799  | 0.214±0.194 | 23799  | 37124  | 75395  | 99912  | 0.299±0.063 |
|     |                                         |           |         | 14.908 | 8.6318 | 11.237 | 10.078 |             | 296.79 | 56.781 | 257.02 | 76.487 |             |
| 186 | Pentanal                                | 110-62-3  | 9.75    | 09505  | 79149  | 00711  | 0061   | 0.001±0.000 | 0761   | 03035  | 36361  | 15391  | 0.157±0.060 |
|     |                                         |           |         | 18.102 | 10.452 | 12.420 | 26.317 |             | 49.712 | 11.398 | 213.53 | 284.44 |             |
| 187 | Pentanoic acid, 3-methyl-, methyl ester | 2177-78-8 | 14.75   | 95622  | 01517  | 87381  | 34286  | 0.072±0.012 | 56297  | 53934  | 14196  | 45529  | 0.114±0.006 |
|     |                                         |           |         | 419.98 | 283.93 | 318.71 | 1087.9 |             | 0.1472 | 15.485 | 0.1472 | 0.1472 |             |
| 188 | Pentanoic acid, 4-methyl-, methyl ester | 2412-80-8 | 15.1667 | 15772  | 25609  | 3941   | 98219  | 0.080±0.018 | 23799  | 05004  | 23799  | 23799  | 0.023±0.008 |
|     |                                         |           |         | 0.1472 | 18.261 | 24.716 | 35.129 |             | 16.092 | 0.4350 | 67.084 | 5.6645 |             |
| 189 | Pentanoic acid, 4-oxo-                  | 123-76-2  | 20.0833 | 23799  | 48202  | 99927  | 03221  | 2.208±0.282 | 83841  | 96169  | 27486  | 43972  | 0.060±0.012 |
|     |                                         |           |         | 33.634 | 27.788 | 31.325 | 208.15 |             | 0.1472 | 55.827 | 417.44 | 215.17 |             |
| 190 | Phenylethyl Alcohol                     | 60-12-8   | 35.25   | 87795  | 20095  | 02974  | 63383  | 0.158±0.036 | 23799  | 06126  | 38996  | 90881  | 0±0         |

|     |                                      |           |         |        |        |        |        |             |        |        |        |        |             |
|-----|--------------------------------------|-----------|---------|--------|--------|--------|--------|-------------|--------|--------|--------|--------|-------------|
|     |                                      | 21195-59- |         | 18.844 | 11.491 | 26.663 | 291.39 |             | 2533.1 | 744.99 | 9629.0 | 0.1472 |             |
| 191 | p-Mentha-1,5,8-triene                | 5         | 23.75   | 41948  | 05068  | 50383  | 64864  | 0.212±0.037 | 63645  | 94103  | 48091  | 23799  | 0.154±0.016 |
|     |                                      |           |         | 58.902 | 87.988 | 147.24 | 0.1472 |             | 115.97 | 1624.1 | 5.6170 | 1320.3 |             |
| 192 | p-Mentha-1,5-dien-8-ol               | 1686-20-0 | 32.25   | 9604   | 05158  | 45979  | 23799  | 0.121±0.040 | 92682  | 39196  | 20243  | 06879  | 0.064±0.004 |
|     |                                      |           |         | 2.4627 | 2.0525 | 2.1152 | 494.23 |             | 704.73 | 132.50 | 1139.0 | 820.99 |             |
| 193 | Propanal                             | 123-38-6  | 5.41667 | 65041  | 36821  | 73314  | 45505  | 0.735±0.332 | 34827  | 09599  | 44711  | 22263  | 0.047±0.016 |
|     |                                      |           |         | 15.436 | 12.181 | 12.150 | 0.1472 |             | 53.375 | 50.467 | 82.065 | 18.696 |             |
| 194 | Propanal, 2-methyl-                  | 78-84-2   | 5.66667 | 12151  | 48499  | 44231  | 23799  | 0.013±0.002 | 88514  | 08366  | 81578  | 60357  | 0.087±0.012 |
|     |                                      |           |         | 154.07 | 0.1472 | 0.1472 | 11.968 |             | 33.978 | 27.090 | 76.756 | 49.333 |             |
| 195 | Propane                              | 74-98-6   | 43.0833 | 83764  | 23799  | 23799  | 96383  | 0.085±0.006 | 28287  | 05269  | 24732  | 87388  | 0±0         |
|     |                                      |           |         | 13.621 | 10.908 | 10.679 | 24.978 |             | 76.297 | 136.08 | 85.621 | 51.457 |             |
| 196 | Propanoic acid                       | 79-09-4   | 26.4167 | 02675  | 15888  | 98896  | 56889  | 0.001±0.000 | 50967  | 73739  | 09088  | 06416  | 0.073±0.093 |
|     |                                      |           |         | 0.1472 | 7.3346 | 0.1472 | 3.4278 |             | 37.854 | 29.028 | 14.956 | 0.1472 |             |
| 197 | Propanoic acid, 2-methylpropyl ester | 540-42-1  | 22      | 23799  | 88887  | 23799  | 85807  | 0.075±0.005 | 85449  | 0027   | 96788  | 23799  | 0.124±0.019 |
|     |                                      |           |         | 0.1472 | 0.1472 | 0.1472 | 30.808 |             | 51.224 | 136.35 | 74.762 | 126.33 |             |
| 198 | Propanoic acid, 2-oxo-, ethyl ester  | 617-35-6  | 7.66667 | 23799  | 23799  | 23799  | 78859  | 0.001±0.000 | 68988  | 18249  | 83369  | 92329  | 0.053±0.012 |
|     |                                      |           |         | 3.8227 | 35.638 | 49.483 | 102.84 |             | 90.468 | 0.1472 | 13.561 | 164.66 |             |
| 199 | Propanoic acid, 2-phenylethyl ester  | 122-70-3  | 36.6667 | 63153  | 23246  | 22873  | 04177  | 0.001±0.000 | 0923   | 23799  | 24952  | 66974  | 0.081±0.021 |
|     |                                      |           |         | 0.1472 | 169.47 | 139.41 | 670.35 |             | 67.795 | 0.1472 | 915.63 | 0.1472 |             |
| 200 | Propylene Glycol                     | 57-55-6   | 40.5833 | 23799  | 38908  | 5802   | 64961  | 0.225±0.141 | 8327   | 23799  | 06208  | 23799  | 0±0         |
|     |                                      |           |         | 0.1472 | 0.1472 | 47.718 | 68.327 |             | 129.47 | 243.98 | 107.53 | 77.317 |             |
| 201 | R-(-)-1,2-propanediol                | 4254-14-2 | 44.9167 | 23799  | 23799  | 11115  | 77006  | 0.834±0.329 | 701    | 8283   | 91135  | 62136  | 0.600±0.268 |
|     |                                      |           |         | 2.0652 | 1.8733 | 1.1949 | 0.1472 |             | 5.7931 | 38.518 | 32.696 | 100.84 |             |
| 202 | Styrene                              | 100-42-5  | 18.8333 | 70177  | 57911  | 07648  | 23799  | 0.001±0.000 | 27562  | 67927  | 4353   | 18285  | 0.101±0.055 |
|     |                                      |           |         | 163.14 | 92.091 | 174.01 | 71.363 |             | 58.207 | 1997.1 | 118.40 | 91.627 |             |
| 203 | Terpinen-4-ol                        | 562-74-3  | 28.25   | 53346  | 67491  | 26323  | 09625  | 0.009±0.004 | 48916  | 93743  | 13334  | 22591  | 0±0         |



|     |                                        |           |         |        |        |        |        |             |        |        |        |        |              |
|-----|----------------------------------------|-----------|---------|--------|--------|--------|--------|-------------|--------|--------|--------|--------|--------------|
|     |                                        |           |         | 72.419 | 0.1472 | 0.1472 | 0.1472 |             | 55.190 | 60.600 | 276.31 | 108.78 |              |
| 204 | Tetraethylene glycol                   | 112-60-7  | 47.25   | 24559  | 23799  | 23799  | 23799  | 0.964±0.255 | 90108  | 82784  | 03324  | 84096  | 12.370±3.425 |
|     |                                        | 30361-34- |         | 90.715 | 77.760 | 121.11 | 0.1472 |             | 20.690 | 11.863 | 40.337 | 10.770 |              |
| 205 | trans, trans-Octa-2,4-dienyl acetate   | 3         | 28.4167 | 99196  | 96593  | 72253  | 23799  | 0.001±0.000 | 48314  | 79816  | 39051  | 78049  | 0.254±0.199  |
|     |                                        |           |         | 0.1472 | 0.1472 | 0.1472 | 300.44 |             | 509.42 | 603.48 | 575.32 | 555.32 |              |
| 206 | trans-β-Ocimene                        | 3779-61-1 | 11.25   | 23799  | 23799  | 23799  | 225    | 0.609±0.153 | 03466  | 79631  | 72675  | 20264  | 2.594±0.892  |
|     |                                        |           |         | 3.1846 | 2.3552 | 3.6116 | 140.13 |             | 38.530 | 54.531 | 216.30 | 181.24 |              |
| 207 | trans-Carveol                          | 1197-07-5 | 33.5    | 42477  | 55567  | 8006   | 65707  | 0.001±0.000 | 1805   | 65102  | 70897  | 6286   | 20.813±5.934 |
|     |                                        |           |         | 885.82 | 736.21 | 779.10 | 1096.9 |             | 1751.3 | 1154.9 | 1595.2 | 1246.8 |              |
| 208 | Trichloroacetic acid, 3-tridecyl ester | 0-00-0    | 23.25   | 54852  | 49363  | 03387  | 57006  | 0.019±0.003 | 7895   | 39028  | 26751  | 32159  | 1.334±0.232  |
|     |                                        |           |         | 28.536 | 0.9060 | 0.1472 | 1471.3 |             | 2934.1 | 3465.8 | 4217.0 | 3595.7 |              |
| 209 | Trichloromethane                       | 67-66-3   | 11      | 725    | 46701  | 23799  | 40586  | 0.076±0.082 | 17756  | 67422  | 7105   | 34364  | 0.358±0.183  |
|     |                                        |           |         | 14.924 | 0.1472 | 0.1472 | 135.31 |             | 74.455 | 0.1472 | 80.832 | 6011.9 |              |
| 210 | Triethylene glycol                     | 112-27-6  | 40.4167 | 6396   | 23799  | 23799  | 31599  | 0.001±0.000 | 43494  | 23799  | 2778   | 5086   | 0.153±0.044  |
|     |                                        |           |         | 0.1472 | 29.457 | 201.40 | 38.330 |             | 88.034 | 108.20 | 7.8176 | 0.1472 |              |
| 211 | Triethylene glycol monomethyl ether    | 112-35-6  | 45.1667 | 23799  | 06549  | 31657  | 57819  | 0.564±0.642 | 16146  | 84172  | 75373  | 23799  | 0.330±0.129  |
|     |                                        |           |         | 107.02 | 83.822 | 109.38 | 0.1472 |             | 0.1472 | 0.1472 | 141.66 | 16.183 |              |
| 212 | Undecanal, 2-methyl-                   | 110-41-8  | 18.8333 | 97043  | 10896  | 63389  | 23799  | 0.629±0.077 | 23799  | 23799  | 58355  | 25281  | 0.127±0.014  |

**Table S2** Regression equation and linearity range ( $\mu\text{g/mL}$  n=8)

|                             | Regression equation | Linearity range ( $\mu\text{g/mL}$ ) | Related Coefficientt |
|-----------------------------|---------------------|--------------------------------------|----------------------|
| hydroxy- $\alpha$ -sanshool | $y=7.8504x+19.582$  | 20~1000                              | 0.9993               |
| hydroxy- $\beta$ -sanshool  | $y=4.4179x+3.3323$  | 20~1000                              | 0.9998               |
| hydroxy- $\gamma$ -sanshool | $y=3.917x+30.392$   | 20~1000                              | 0.9987               |

**Table S3** Degree of precision (n=6)

|                             | Peak area |        |        |        |        |        | RSD value(%) |
|-----------------------------|-----------|--------|--------|--------|--------|--------|--------------|
| hydroxy- $\alpha$ -sanshool | 4054.5    | 4054.5 | 4232.1 | 4071.4 | 4091.7 | 4083.8 | 1.6448       |
| hydroxy- $\beta$ -sanshool  | 4590.8    | 4590.8 | 4593.2 | 4602.9 | 4623.4 | 4625.9 | 0.353        |
| hydroxy- $\gamma$ -sanshool | 8150.2    | 8150.2 | 8131.5 | 8181.6 | 8201.8 | 8198   | 0.3543       |

**Table S4** Research on the reproducibility

|                             | Sample content ( $\mu\text{g/mL}$ ) |          |          |          |          | RSD value(%) |
|-----------------------------|-------------------------------------|----------|----------|----------|----------|--------------|
| hydroxy- $\alpha$ -sanshool | 12.63926                            | 13.60939 | 13.83916 | 13.25198 | 12.25632 | 5.0434       |
| hydroxy- $\beta$ -sanshool  | 26.09106                            | 25.29883 | 29.03364 | 25.59308 | 24.52923 | 6.6261       |
| hydroxy- $\gamma$ -sanshool | 729.5193                            | 716.4499 | 801.9869 | 788.357  | 859.1305 | 7.4284       |

**Table S5** Research on the stability

|                             | Injection time/h |       |        |        |        |        | RSD/% |
|-----------------------------|------------------|-------|--------|--------|--------|--------|-------|
|                             | 0                | 2     | 4      | 6      | 8      | 10     |       |
| hydroxy- $\alpha$ -sanshool | 75.6             | 87    | 78.7   | 75.1   | 88.1   | 85.7   | 7.24  |
| hydroxy- $\beta$ -sanshool  | 120.1            | 121.8 | 115.4  | 119    | 137.8  | 131.6  | 6.89  |
| hydroxy- $\gamma$ -sanshool | 5588.5           | 6073  | 5561.5 | 6187.3 | 6223.6 | 5669.4 | 5.27  |

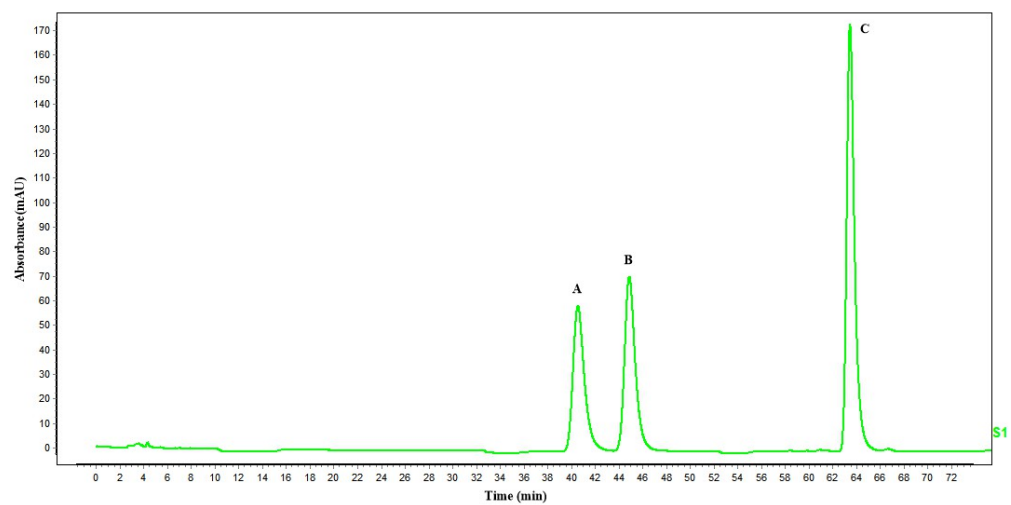

**Figure S1** HPLC chromatogram of mixed standard of three compounds. A: hydroxy- $\alpha$ -sanshool; B: hydroxy- $\beta$ -sanshool C: hydroxy- $\gamma$ -sanshool

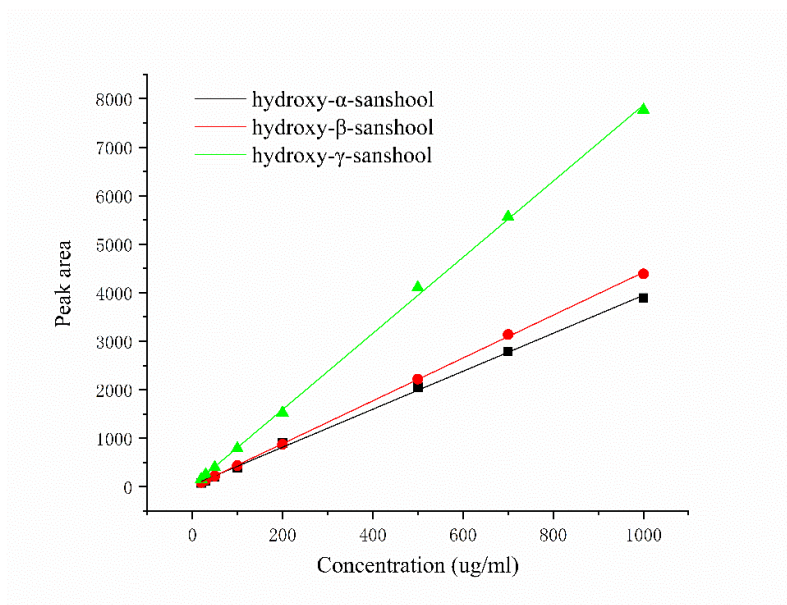

**Figure S2** Standard curve of three sanshools
